# Supplementary material for: Cognitive Enhancement via Neuromodulation and Video Games: Synergistic Effects?
Source: PubMed Central journal article supplement (PMC7319101; doi:10.3389/fnhum.2020.00235), 2020-06-19
Supplement: Table_1.pdf [file Table_1.pdf]

**Table S1. Data summary for each test on each of the 3 different assessment time points.**

| Test                   | Variable            | Group   | Pre                 |                  | Post1               |                  | Post2               |                  |              |
|------------------------|---------------------|---------|---------------------|------------------|---------------------|------------------|---------------------|------------------|--------------|
|                        |                     |         | Mean $\pm$ SD       | CI 95%           | Mean $\pm$ SD       | CI 95%           | Mean $\pm$ SD       | CI 95%           |              |
| Video game performance | 10-session training | Active  | 31.79 $\pm$ 27.72   | 15.78 - 47.79    | -                   | -                | -                   | -                |              |
|                        |                     | Sham    | 29.92 $\pm$ 24.63   | 15.04 - 44.81    | -                   | -                | -                   | -                |              |
|                        | Pre vs. post skills | Active  | 8.57 $\pm$ 2.441    | 7.16 - 9.98      | 13.14 $\pm$ 3.483   | 11.13 - 15.15    | -                   | -                |              |
|                        |                     | Sham    | 9.31 $\pm$ 2.810    | 7.61 - 11.01     | 13.15 $\pm$ 3.255   | 11.86 - 14.44    | -                   | -                |              |
| RT                     | Simple              | Active  | 262.65 $\pm$ 32.74  | 243.75 - 281.55  | 265.32 $\pm$ 37.47  | 243.68 - 286.95  | 290.95 $\pm$ 43.18  | 266.02 - 315.88  |              |
|                        |                     | Sham    | 272.76 $\pm$ 24.66  | 257.85 - 287.66  | 270.91 $\pm$ 32.77  | 257.95 - 283.87  | 276.53 $\pm$ 34.44  | 255.71 - 297.34  |              |
|                        | Direction choice    | Active  | 320.34 $\pm$ 37.29  | 298.81 - 341.88  | 324.79 $\pm$ 38.45  | 302.59 - 346.99  | 339.78 $\pm$ 46.85  | 312.73 - 366.83  |              |
|                        |                     | Sham    | 347.40 $\pm$ 47.46  | 318.72 - 376.07  | 341.40 $\pm$ 45.38  | 341.40 - 45.38   | 340.11 $\pm$ 43.65  | 313.73 - 366.48  |              |
|                        | Color choice        | Active  | 455.70 $\pm$ 75.49  | 412.11 - 499.29  | 466.87 $\pm$ 79.98  | 420.70 - 513.05  | 475.56 $\pm$ 87.87  | 424.82 - 526.29  |              |
|                        |                     | Sham    | 468.03 $\pm$ 63.53  | 429.64 - 506.42  | 449.57 $\pm$ 37.13  | 427.13 - 472.01  | 462.88 $\pm$ 56.43  | 428.77 - 496.98  |              |
|                        | Digits              | Forward | Active              | 9.43 $\pm$ 1.50  | 8.56 - 10.30        | 10.29 $\pm$ 2.43 | 8.88 - 11.69        | 10.57 $\pm$ 1.40 | 9.04 - 12.19 |
|                        |                     |         | Sham                | 9.31 $\pm$ 2.18  | 7.99 - 10.62        | 10.23 $\pm$ 2.09 | 8.97 - 11.49        | 10.62 $\pm$ 2.60 | 9.76 - 11.38 |
| Backward               |                     | Active  | 8.79 $\pm$ 2.72     | 7.21 - 10.36     | 9.07 $\pm$ 1.86     | 8.00 - 10.14     | 10.36 $\pm$ 2.87    | 8.70 - 12.02     |              |
|                        |                     | Sham    | 8.00 $\pm$ 2.52     | 6.48 - 9.52      | 8.38 $\pm$ 1.89     | 7.24 - 9.53      | 9.38 $\pm$ 2.96     | 7.60 - 11.17     |              |
| 3-back                 | Score               | Active  | 50.00 $\pm$ 7.190   | 45.85 - 54.15    | 48.64 $\pm$ 12.822  | 41.24 - 56.05    | 51.57 $\pm$ 7.460   | 47.26 - 55.88    |              |
|                        |                     | Sham    | 48.15 $\pm$ 4.562   | 45.40 - 50.91    | 49.69 $\pm$ 6.250   | 45.92 - 53.47    | 51.46 $\pm$ 3.755   | 49.19 - 53.73    |              |
|                        | RT                  | Active  | 873.47 $\pm$ 304.79 | 697.49 - 1049.45 | 903.50 $\pm$ 276.82 | 743.67 - 1063.33 | 813.32 $\pm$ 225.11 | 683.35 - 943.29  |              |
|                        |                     | Sham    | 943.85 $\pm$ 309.28 | 756.96 - 1130.74 | 918.80 $\pm$ 294.40 | 740.90 - 1096.70 | 833.99 $\pm$ 260.80 | 676.39 - 991.59  |              |
|                        | d'                  | Active  | 1.83 $\pm$ 0.68     | 1.44 - 2.22      | 1.93 $\pm$ 0.76     | 1.49 - 2.36      | 2.13 $\pm$ 0.91     | 1.61 - 2.66      |              |
|                        |                     | Sham    | 1.21 $\pm$ 0.82     | 0.72 - 1.71      | 1.32 $\pm$ 0.89     | 0.78 - 1.86      | 1.86 $\pm$ 0.86     | 1.52 - 2.20      |              |
|                        | Mental rotation     | Score   | Active              | .883 $\pm$ .086  | .833 - .932         | .911 $\pm$ .108  | .849 - .973         | .902 $\pm$ .101  | .844 - .961  |
|                        |                     |         | Sham                | .929 $\pm$ .048  | .899 - .958         | .942 $\pm$ .049  | .913 - .971         | .947 $\pm$ .041  | .922 - .971  |
| RT                     |                     | Active  | 7644 $\pm$ 3716     | 5498 - 9790      | 6250 $\pm$ 2478     | 4819 - 7680      | 4803 $\pm$ 2436     | 3396 - 6210      |              |
|                        |                     | Sham    | 8366 $\pm$ 3139     | 6469 - 10263     | 6186 $\pm$ 2325     | 4781 - 7591      | 4553 $\pm$ 1893     | 3804 - 5302      |              |

| Test           | Variable              | Group          | Pre             |                 | Post1           |                 | Post2           |                 |
|----------------|-----------------------|----------------|-----------------|-----------------|-----------------|-----------------|-----------------|-----------------|
|                |                       |                | Mean ± SD       | CI 95%          | Mean ± SD       | CI 95%          | Mean ± SD       | CI 95%          |
| Stop-switching | Go score              | Active         | 285.93 ± 2.018  | 284.76 - 287.09 | 286.50 ± 2.066  | 285.31 - 287.69 | 286.71 ± 1.437  | 285.88 - 287.54 |
|                |                       | Sham           | 286.08 ± 1.706  | 286.08 - 1.706  | 286.54 ± 2.470  | 285.05 - 288.03 | 286.77 ± 1.166  | 286.06 - 287.47 |
|                | Go RT                 | Active         | 733.79 ± 144.97 | 650.08 - 817.49 | 768.67 ± 177.31 | 666.30 - 871.05 | 798.31 ± 176.25 | 696.55 - 900.07 |
|                |                       | Sham           | 734.01 ± 129.03 | 656.04 - 811.99 | 734.67 ± 144.54 | 647.32 - 822.01 | 762.70 ± 140.16 | 678.00 - 847.40 |
|                | Stop score            | Active         | 61.07 ± 7.07    | 56.99 - 65.15   | 64.00 ± 7.21    | 59.84 - 68.16   | 65.50 ± 5.96    | 62.06 - 68.94   |
|                |                       | Sham           | 63.00 ± 7.45    | 58.50 - 67.50   | 63.92 ± 8.32    | 58.89 - 68.95   | 64.46 ± 7.89    | 59.69 - 69.23   |
|                | Stop signal RT (SSRT) | Active         | 27.79 ± 95.37   | -27.28 - 82.85  | 64.58 ± 81.31   | 17.63 - 111.52  | 58.62 ± 86.80   | 8.50 - 108.74   |
|                |                       | Sham           | 17.89 ± 79.27   | -30.01 - 65.79  | 58.80 ± 76.34   | 12.67 - 104.93  | 69.34 ± 81.34   | 20.19 - 118.50  |
|                | Switch score          | Active         | 53.71 ± 9.587   | 48.18 - 59.25   | 56.93 ± 10.637  | 50.79 - 63.07   | 58.57 ± 9.221   | 53.25 - 63.90   |
|                |                       | Sham           | 54.46 ± 8.452   | 49.35 - 59.57   | 57.23 ± 10.248  | 51.04 - 63.42   | 58.77 ± 9.311   | 53.14 - 64.40   |
|                | Switch RT             | Active         | 130.83 ± 76.96  | 86.39 - 175.26  | 109.67 ± 98.35  | 52.88 - 166.46  | 100.80 ± 119.67 | 31.70 - 169.90  |
|                |                       | Sham           | 158.61 ± 66.88  | 118.20 - 199.02 | 148.00 ± 63.80  | 109.44 - 186.55 | 124.46 ± 58.28  | 89.24 - 159.68  |
| Raven          | Score                 | Active         | 27.00 ± 4.26    | 24.54 - 29.46   | 26.79 ± 3.19    | 24.94 - 28.63   | -               | -               |
|                |                       | Sham           | 28.38 ± 1.71    | 27.35 - 29.42   | 27.62 ± 2.02    | 26.39 - 28.84   | -               | -               |
|                | RT                    | Active         | 15022 ± 5796    | 11675 - 18368   | 14165 ± 4907    | 11332 - 16998   | -               | -               |
|                |                       | Sham           | 21184 ± 8045    | 16322 - 26046   | 18460 ± 4215    | 15913 - 21007   | -               | -               |
| Matchstick     | Accuracy              | Active         | 5.00 ± 2.038    | 3.82 - 6.18     | -               | -               | -               | -               |
|                |                       | Sham           | 5.23 ± 1.878    | 4.10 - 6.37     | -               | -               | -               | -               |
|                | RT (correct answers)  | Active         | 47647 ± 17969   | 37272 - 58022   | -               | -               | -               | -               |
|                |                       | Sham           | 48986 ± 21271   | 36132 - 61840   | -               | -               | -               | -               |
| Five-point     | Active                | 30.00 ± 10.054 | 24.20 - 35.80   | -               | -               | -               | -               |                 |
|                | Sham                  | 33.23 ± 7.596  | 28.64 - 37.82   | -               | -               | -               | -               |                 |

Note: RT: Reaction time; SD: Standard deviation; CI: Confidence interval.
