# Supplementary material for: Cognitive Enhancement via Neuromodulation and Video Games: Synergistic Effects?
Source: PubMed Central journal article supplement (PMC7319101; doi:10.3389/fnhum.2020.00235), 2020-06-19
Supplement: Table_2.pdf [file Table_2.pdf]

**Table S2. Bayesian analysis for comparisons of video games and cognitive tests performance for the Active vs. Sham groups.**

| Test                   | Variable            | Assessment time points | Scores                                            | Bayesian Statistical test | Main effects (BF <sub>10</sub> )                        |                                         | Interaction                                                                                                  |
|------------------------|---------------------|------------------------|---------------------------------------------------|---------------------------|---------------------------------------------------------|-----------------------------------------|--------------------------------------------------------------------------------------------------------------|
|                        |                     |                        |                                                   |                           | Group                                                   | Time                                    |                                                                                                              |
| Video game performance | 10-session training | 1                      | Direct                                            | Mann-Whitney              | BF <sub>0</sub> =0.450, W=93.500, R <sup>2</sup> =1.000 | -                                       | -                                                                                                            |
|                        | Pre vs. post skills | 2                      | Direct                                            | rmANOVA                   | 0.362, err%=1.607                                       | <b>6.575×10<sup>7</sup>, err%=2.163</b> | BF <sub>incl</sub> =0.478                                                                                    |
| RT                     | Simple              | 3                      | Direct                                            | rmANOVA                   | 0.470, err%=1.747                                       | <b>6.488, err%=0.740</b>                | BF <sub>incl</sub> =0.359                                                                                    |
|                        | Direction choice    | 3                      | Transformed (Post1-Pre, Post2-Pre)                | ANOVA                     | -                                                       | -                                       | BF <sub>10</sub> =0.510, err%=8.382×10 <sup>-5</sup><br>BF <sub>10</sub> =0.941, err%=0.003                  |
|                        | Color choice        | 3                      | Transformed (Post1-Pre, Post2-Pre)                | ANOVA                     | -                                                       | -                                       | BF <sub>10</sub> =0.631, err%=0.003<br>BF <sub>10</sub> =0.505, err%=4.316×10 <sup>-5</sup>                  |
| Digits                 | Forward             | 3                      | Direct (Pre vs. Post1)<br>Transformed (Post2-Pre) | rmANOVA<br>ANOVA          | 0.421, err%=0.679<br>-                                  | <b>2.923, err%=0.877</b><br>-           | BF <sub>incl</sub> =0.336<br>BF <sub>10</sub> =0.363, err%=8.871×10 <sup>-6</sup>                            |
|                        | Backward            | 3                      | Transformed (Post1-Pre, Post2-Pre)                | ANOVA                     | -                                                       | -                                       | BF <sub>10</sub> =0.362, err%=7.087×10 <sup>-6</sup><br>BF <sub>10</sub> =0.365, err%=1.188×10 <sup>-5</sup> |
| 3-back                 | Score               | 3                      | Transformed (Post1-Pre, Post2-Pre)                | ANOVA                     | -                                                       | -                                       | BF <sub>10</sub> =0.491, err%=2.558×10 <sup>-5</sup><br>BF <sub>10</sub> =0.535, err%=4.655×10 <sup>-4</sup> |
|                        | RT                  | 3                      | Direct                                            | rmANOVA                   | 0.578, err%=2.085                                       | <b>4.091, err%=0.595</b>                | BF <sub>incl</sub> =0.477                                                                                    |
|                        | d'                  | 3                      | Direct                                            | rmANOVA                   | <b>2.580, err%=1.243</b>                                | 0.754, err%=1.247                       | BF <sub>incl</sub> =0.351                                                                                    |
| Mental rotation        | Score               | 3                      | Transformed (Post1-Pre, Post2-Pre)                | ANOVA                     | -                                                       | -                                       | BF <sub>10</sub> =0.487, err%=4.792×10 <sup>-5</sup><br>BF <sub>10</sub> =0.360, err%=4.885×10 <sup>-6</sup> |
|                        | RT                  | 3                      | Transformed (Post1-Pre, Post2-Pre)                | Mann-Whitney              | -                                                       | -                                       | BF <sub>0</sub> =0.166, W=128.000, R <sup>2</sup> =1.001                                                     |

| Test           | Variable              | Assessment time points | Scores                                         | Bayesian Statistical test                    | Main effects (BF <sub>10</sub> )   |                               | Interaction                                                                                 |
|----------------|-----------------------|------------------------|------------------------------------------------|----------------------------------------------|------------------------------------|-------------------------------|---------------------------------------------------------------------------------------------|
|                |                       |                        |                                                |                                              | Group                              | Time                          |                                                                                             |
|                |                       |                        |                                                |                                              |                                    |                               | BF <sub>0</sub> =0.247, W=113.000, R <sup>2</sup> =1.001                                    |
| Stop-switching | Go score              | 3                      | Transformed (Post1-Pre, Post2-Pre)             | Mann-Whitney (Post1-Pre) rmANOVA (Post2-Pre) | -<br>0.323, err%=1.979             | -<br>0.361, err%=0.885        | BF <sub>0</sub> =0.379, W=87.500, R <sup>2</sup> =1.001<br>BF <sub>incl</sub> =0.372        |
|                | Go RT                 | 3                      | Direct                                         | rmANOVA                                      | 0.563, err%=2.064                  | <b>1.387, err%=0.930</b>      | BF <sub>incl</sub> =0.466                                                                   |
|                | Stop score            | 3                      | Transformed (Post1-Pre, Post2-Pre)             | ANOVA                                        | -                                  | -                             | BF <sub>10</sub> =0.544, err%=6.710×10 <sup>-4</sup><br>BF <sub>10</sub> =0.548, err%=0.002 |
|                | Stop signal RT (SSRT) | 3                      | Direct (Pre vs. Post1) Transformed (Post2-Pre) | rmANOVA<br>Mann-Whitney                      | 0.367, err%=1.445<br>-             | <b>1.828, err%=4.149</b><br>- | BF <sub>incl</sub> =0.339<br>BF <sub>0</sub> =0.488, W=75.500, R <sup>2</sup> =1.001        |
|                | Switch score          | 3                      | Direct                                         | rmANOVA                                      | 0.480, err%=1.831                  | <b>9.174, err%=0.671</b>      | BF <sub>incl</sub> =0.376                                                                   |
|                | Switch RT             | 3                      | Direct                                         | rmANOVA                                      | 0.673, err%=0.829                  | <b>2.037, err%=1.855</b>      | BF <sub>incl</sub> =0.361                                                                   |
| Raven          | Score                 | 2                      | Transformed (Post1-Pre)                        | Mann-Whitney                                 | -                                  | -                             | BF <sub>0</sub> =0.520, W=100.500, R <sup>2</sup> =1.000                                    |
|                | RT                    | 2                      | Direct                                         | rmANOVA                                      | <b>4.538, err%=0.768</b>           | 0.639, err%=1.544             | BF <sub>incl</sub> =0.429                                                                   |
| Matchstick     | Accuracy              | 1                      | Direct                                         | t-test                                       | 0.371, err%=3.012×10 <sup>-5</sup> | -                             | -                                                                                           |
|                | RT (correct answers)  | 1                      | Direct                                         | t-test                                       | 0.362, err%=7.664×10 <sup>-6</sup> | -                             | -                                                                                           |
| Five-point     |                       | 1                      | Direct                                         | t-test                                       | 0.496, err%=6.673×10 <sup>-6</sup> | -                             | -                                                                                           |

Note: Bayesian probabilities higher than the null model are marked in bold. Credibility interval: 95.0%. BF: Bayes Factor; BF<sub>10</sub>: evidence for the alternative hypothesis relative to the null hypothesis; BF<sub>0</sub>: evidence for the one-sided alternative hypothesis that group one < group two, relative to the null hypothesis, BF<sub>incl</sub>: change from prior to posterior inclusion odds; err%: error percentage gives a numerical robustness of the result (the lower the err%, the greater numerical stability of the result); RT: Reaction time.
